# Supplementary material for: Long term stability and infectivity of herpesviruses in water
Source: PubMed Central journal article supplement (PMC5399353; doi:10.1038/srep46559), 2017-04-21
Supplement: srep46559-s1.pdf [file srep46559-s1.pdf]

## Long term stability and infectivity of herpesviruses in water

Anisha Dayaram<sup>a\*</sup>, Mathias Franz<sup>a</sup>, Alexander Schattschneider<sup>a</sup>, Armando M. Damiani<sup>b</sup>, Sebastian Bischofberger<sup>b</sup>, Nikolaus Osterrieder<sup>b</sup>, Alex D. Greenwood<sup>a,c</sup>

<sup>a</sup> Leibniz-Institute for Zoo and Wildlife Research, Alfred-Kowalke-Strasse 17, 10315 Berlin, Germany

<sup>b</sup> Institut für Virologie, Freie Universität Berlin, Robert-von-Ostertag-Str. 7-13, 14163 Berlin, Germany

<sup>c</sup> Department of Veterinary Medicine, Freie Universität Berlin, Oertzenweg 19b, 14163, Germany

**Supplementary Table 1:** Results of statistical analyses performed on copy number values and cytopathic effects (CPE) observed in cell culture. The response variables were: dilution factor, day, pH, salinity, temperature, and sediment. The predictors of copy number were log transformed: Initial DNA extraction A, B, C D, F, G. Cell culture copy number H, I, J, K and M. Cell culture values (no transformation) E, L, M and N.

| A EHV-1 serial dilution: copy number initial water |          |            |         |         |        |  |
|----------------------------------------------------|----------|------------|---------|---------|--------|--|
|                                                    | Estimate | Std. Error | t-value | p-value | Pr(>t) |  |
| Intercept                                          | 20.96    | 0.75       | 27.76   | 0.00    | ***    |  |
| Log (Dilution factor)                              | -0.62    | 0.05       | -11.73  | 0.00    | ***    |  |
| Day                                                | -0.42    | 0.07       | -6.20   | 0.00    | ***    |  |
| Log (Dilution factor):Day                          | 0.01     | 0.00       | 3.04    | 0.00    | **     |  |

  

| B EHV-1 salinity: copy number initial water |          |            |        |         |        |  |
|---------------------------------------------|----------|------------|--------|---------|--------|--|
|                                             | Estimate | Std. Error | Error  | p-value | Pr(>t) |  |
| Intercept                                   | 22.37    | 0.41       | 54.59  | 0.00    | ***    |  |
| Salinity                                    | 0.02     | 0.02       | 0.96   | 0.35    |        |  |
| Day                                         | -0.38    | 0.03       | -10.96 | 0.00    | ***    |  |

  

| C EHV-1 sediment: copy number initial water |          |            |         |         |        |  |
|---------------------------------------------|----------|------------|---------|---------|--------|--|
|                                             | Estimate | Std. Error | t-value | p-value | Pr(>t) |  |
| Intercept                                   | 21.98    | 0.51       | 43.49   | 0.00    | ***    |  |
| Soil                                        | -0.03    | 0.01       | -4.74   | 0.00    | ***    |  |
| Day                                         | -0.40    | 0.04       | -10.29  | 0.00    | ***    |  |

  

| D EHV-1 pH: copy number initial water |          |            |         |         |        |  |
|---------------------------------------|----------|------------|---------|---------|--------|--|
|                                       | Estimate | Std. Error | t-value | p-value | Pr(>t) |  |
| Intercept                             | 18.02    | 0.96       | 18.79   | 0.00    | ***    |  |
| pH                                    | 0.44     | 0.12       | 3.55    | 0.00    | **     |  |
| Day                                   | -0.35    | 0.04       | -9.66   | 0.00    | ***    |  |

  

| E EHV-1 Salinity: cell culture (CPE) |          |            |         |         |        |  |
|--------------------------------------|----------|------------|---------|---------|--------|--|
|                                      | Estimate | Std. error | z value | p value | Pr(>t) |  |
| Intercept                            | 2.02     | 0.94       | 2.14    | 0.03    | *      |  |
| Salinity                             | 0.05     | 0.04       | 1.05    | 0.29    |        |  |
| Day                                  | -0.15    | 0.08       | -1.98   | 0.05    | *      |  |

  

| F EHV-1 temperature: copy no. initial water (response log transformed) |          |            |         |         |        |  |
|------------------------------------------------------------------------|----------|------------|---------|---------|--------|--|
|                                                                        | Estimate | Std. Error | z value | p-value | Pr(>t) |  |
| Intercept                                                              | 3.25     | 0.03       | 118.47  | 0.00    | ***    |  |
| Temperature                                                            | 0.00     | 0.00       | -0.10   | 0.92    |        |  |
| Day                                                                    | -0.01    | 0.00       | -3.34   | 0.01    | **     |  |
| Temperature:Day                                                        | 0.00     | 0.00       | -3.21   | 0.01    | **     |  |

  

| G EHV-1 temperature: copy no. cell culture (response log transformed) |          |            |         |         |        |  |
|-----------------------------------------------------------------------|----------|------------|---------|---------|--------|--|
|                                                                       | Estimate | Std. Error | z value | p-value | Pr(>t) |  |
| Intercept                                                             | 3.40     | 0.03       | 135.85  | 0.00    | ***    |  |
| Temperature                                                           | 0.00     | 0.00       | -0.38   | 0.71    |        |  |
| Day                                                                   | 0.00     | 0.00       | -1.50   | 0.16    |        |  |

  

| H EHV-1 serial dilution: copy number cell culture |          |            |         |         |        |  |
|---------------------------------------------------|----------|------------|---------|---------|--------|--|
|                                                   | Estimate | Std. Error | t-value | p-value | Pr(>t) |  |
| Intercept                                         | 3.56     | 0.08       | 47.07   | 0.00    | ***    |  |
| Log (Dilution factor)                             | -0.05    | 0.01       | -9.75   | 0.00    | ***    |  |
| Day                                               | -0.05    | 0.01       | -7.37   | 0.00    | ***    |  |
| Log (Dilution factor):Day                         | 0.00     | 0.00       | 2.66    | 0.01    | *      |  |

  

| I EHV-1 salinity: copy number cell culture |          |            |       |         |        |  |
|--------------------------------------------|----------|------------|-------|---------|--------|--|
|                                            | Estimate | Std. Error | Error | p-value | Pr(>t) |  |
| Intercept                                  | 3.04     | 0.13       | 22.67 | 0.00    | ***    |  |
| Salinity                                   | 0.00     | 0.01       | 0.42  | 0.68    |        |  |
| Day                                        | -0.04    | 0.01       | -3.84 | 0.00    | ***    |  |

  

| J EHV-1 sediment: copy number cell culture |          |            |         |         |        |  |
|--------------------------------------------|----------|------------|---------|---------|--------|--|
|                                            | Estimate | Std. Error | t-value | p-value | Pr(>t) |  |
| Intercept                                  | 2.80     | 0.18       | 15.74   | 0.00    | ***    |  |
| Soil                                       | -0.01    | 0.00       | -3.42   | 0.00    | **     |  |
| Day                                        | -0.04    | 0.01       | -2.59   | 0.02    | *      |  |

  

| K EHV-1 pH: copy number cell culture |          |            |         |         |        |  |
|--------------------------------------|----------|------------|---------|---------|--------|--|
|                                      | Estimate | Std. Error | t-value | p-value | Pr(>t) |  |
| Intercept                            | 1.99     | 0.44       | 4.52    | 0.00    | ***    |  |
| pH                                   | 0.13     | 0.06       | 2.24    | 0.03    | *      |  |
| Day                                  | -0.05    | 0.02       | -3.16   | 0.00    | **     |  |

  

| L EHV-1 sediment: cell culture (CPE) |          |            |         |         |        |  |
|--------------------------------------|----------|------------|---------|---------|--------|--|
|                                      | Estimate | Std. Error | z value | p value | Pr(>t) |  |
| Intercept                            | -3.24    | 2.40       | -1.35   | 0.18    |        |  |
| sediment                             | -0.04    | 0.02       | -1.91   | 0.06    |        |  |
| Day                                  | 0.30     | 0.16       | 1.91    | 0.06    |        |  |

  

| M EHV-1 pH: cell culture (CPE) |          |            |         |         |        |  |
|--------------------------------|----------|------------|---------|---------|--------|--|
|                                | Estimate | Std. Error | z value | p-value | Pr(>t) |  |
| Intercept                      | -9.51    | 3.77       | -2.52   | 0.01    | *      |  |
| pH                             | 1.43     | 0.56       | 2.55    | 0.01    | *      |  |

  

| N EHV-1 copy number sediment vs water |          |            |         |         |        |  |
|---------------------------------------|----------|------------|---------|---------|--------|--|
|                                       | Estimate | Std. Error | t-value | p-value | Pr(>t) |  |
| Intercept                             | 23.13    | 0.49       | 46.99   | 0.00    | ***    |  |
| Concentration                         | 0.01     | 0.01       | 1.43    | 0.16    |        |  |
| Extractionwater                       | -1.88    | 0.70       | -2.70   | 0.01    | **     |  |
| Day                                   | -0.24    | 0.04       | -6.25   | 0.00    | ***    |  |
| Concentration:Extractionwater         | -0.04    | 0.01       | -3.55   | 0.00    | ***    |  |
| Extractionwater:Day                   | -0.14    | 0.05       | -2.56   | 0.01    | *      |  |

\*Indicates the p and z value level of significance

## Standard Curve

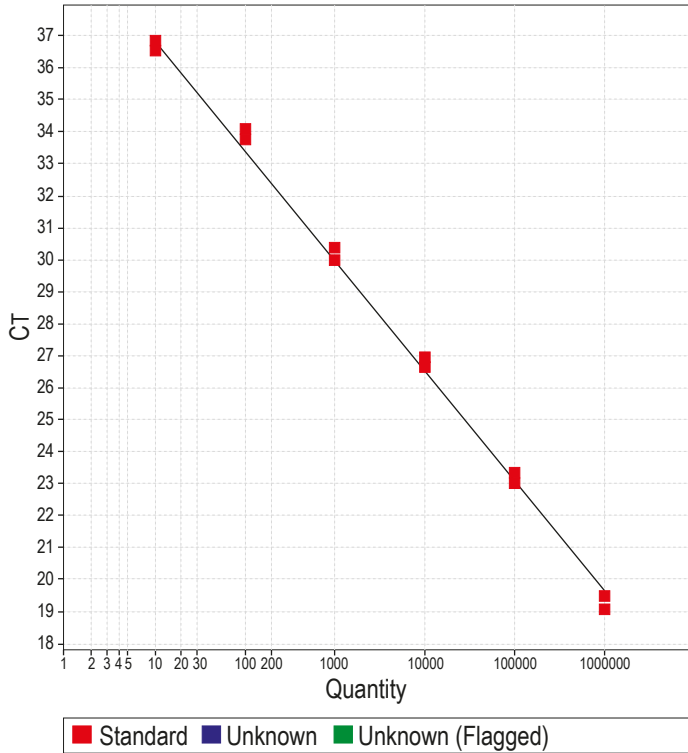

**Supplementary Figure 1:** qPCR standard curve generated from a six fold serial dilution of plasmid DNA from EHV-1 gB glycoprotein BAC, Ab4 strain.
